# Supplementary material for: Thermal, vibrational and optical properties of PrLuO3 interlanthanides from hydrothermally-derived precursors
Source: Royal Society of Chemistry journal article supplement (doi:10.1039/c6dt03857c), 2016-12-12

**Electronic Supplementary Information (ESI†)**

**Thermal, Vibrational and Optical Properties of PrLuO<sub>3</sub>  
Interlanthanides from Hydrothermally-Derived Precursors**

Júlia C. Soares,<sup>a</sup> Kísla P. F. Siqueira,<sup>a</sup> Paulo C. de Sousa Filho,<sup>b</sup> Roberto L. Moreira<sup>c</sup> and Anderson Dias<sup>a</sup>

*<sup>a</sup>Departamento de Química, Universidade Federal de Ouro Preto, Campus Morro do Cruzeiro, ICEB II, Ouro Preto-MG, 35400-000, Brazil. E-mail: anderson\_dias@iceb.ufop.br*

*<sup>b</sup>Departamento de Química, Faculdade de Filosofia, Ciências e Letras de Ribeirão Preto, Universidade de São Paulo, 14040-901 Ribeirão Preto, Brazil*

*<sup>c</sup>Departamento de Física, ICEx, Universidade Federal de Minas Gerais, C.P. 702, Belo Horizonte-MG, 30123-970, Brazil*

**Fig. S1** (a) XRD pattern and (b) Raman spectrum for the hydrothermally-synthesized  $\text{Pr(OH)}_3$  and  $\text{LuO(OH)}$  precursors obtained at  $250^\circ\text{C}$ , showing the coexistence of these two starting phases (as indicated).

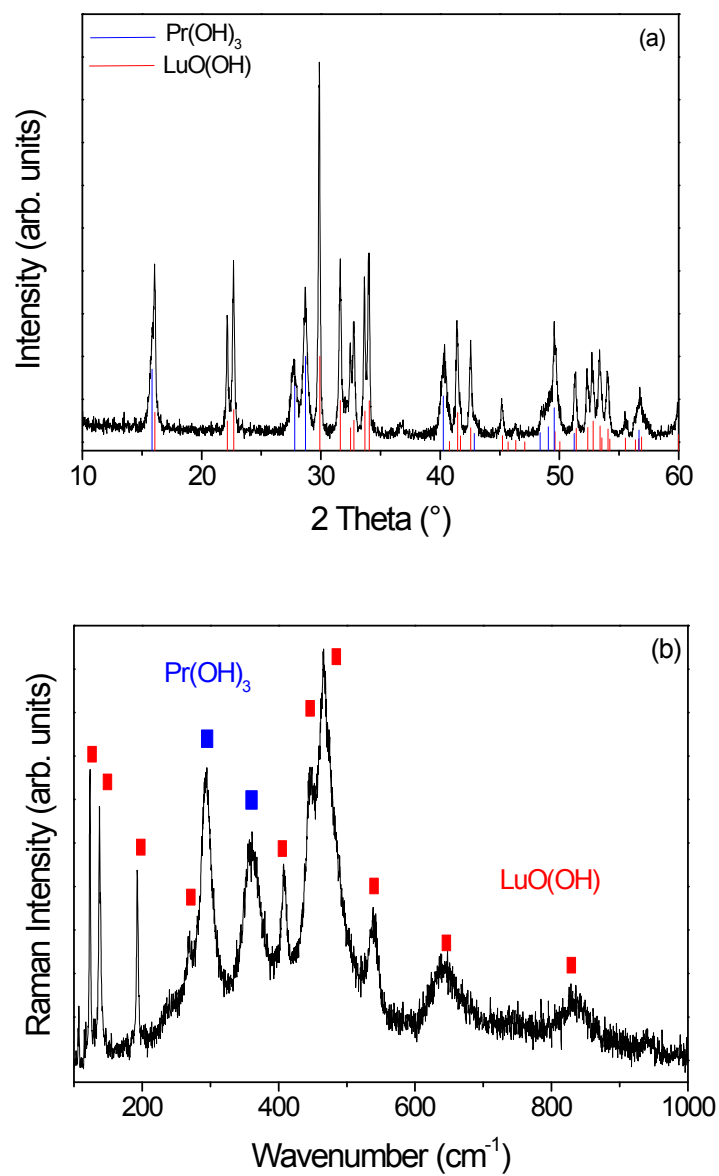

**Fig. S2** DTA/TGA heating runs of the hydrothermally-derived precursors identified by XRD and Raman scattering. The endothermic peaks correspond to the loss of hydroxyl groups toward the formation of lanthanide oxides.

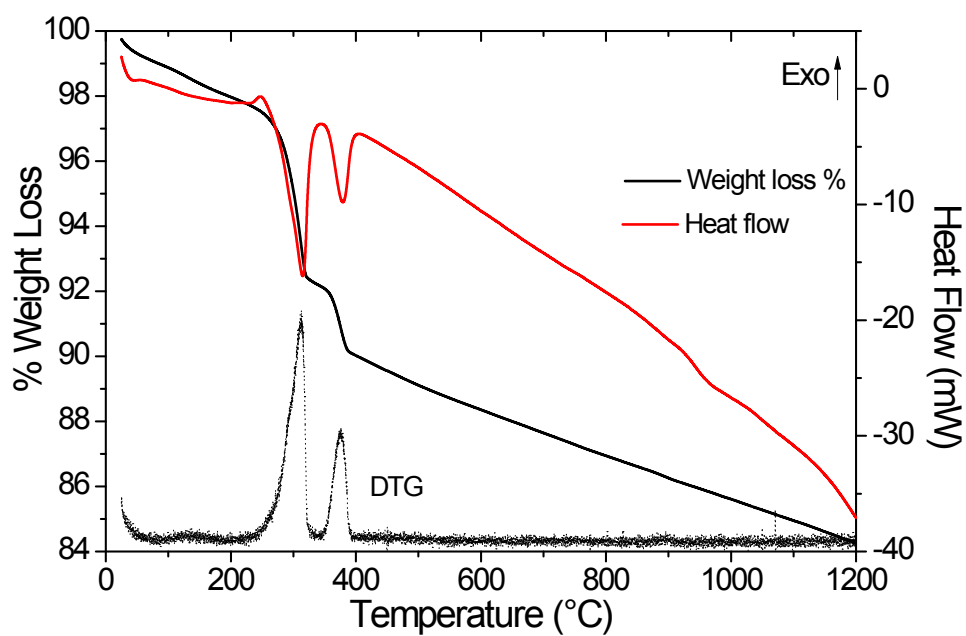

**Fig. S3** (a,c) Excitation ( $\lambda_{em}=655$  nm, corrected for lamp intensity) and (b,d) absorption spectra of the  $\text{PrLuO}_3$  samples annealed at (a,b)  $1400^\circ\text{C}$  (mixed  $P6_3/mmc + Pnma$  sample) and (c,d)  $1600^\circ\text{C}$  (phase-pure  $Pnma$  sample). Insets in (a) and (c) show non-corrected excitation spectra in linear scale; (b) and (d) were mathematically calculated from diffuse reflectance spectra of powders diluted in  $\text{MgO}$ , taking pure  $\text{MgO}$  as blank.

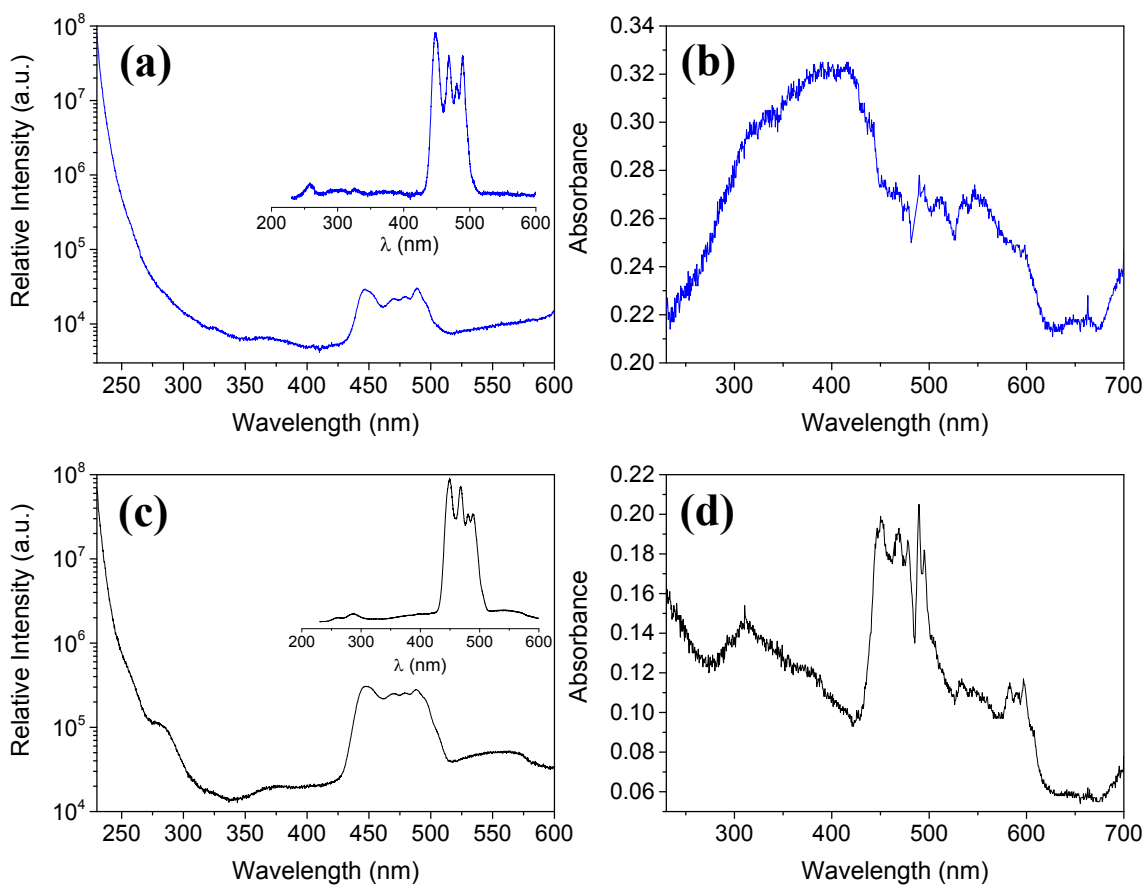

**Fig. S4** Emission spectrum of the PrLuO<sub>3</sub> sample annealed at 1600°C monitoring the <sup>3</sup>P<sub>0</sub>→<sup>3</sup>F<sub>2</sub> transition under 290°C (black squares), and Gaussian peak fits of Stark components (green lines) and cumulative fit peak (red line).

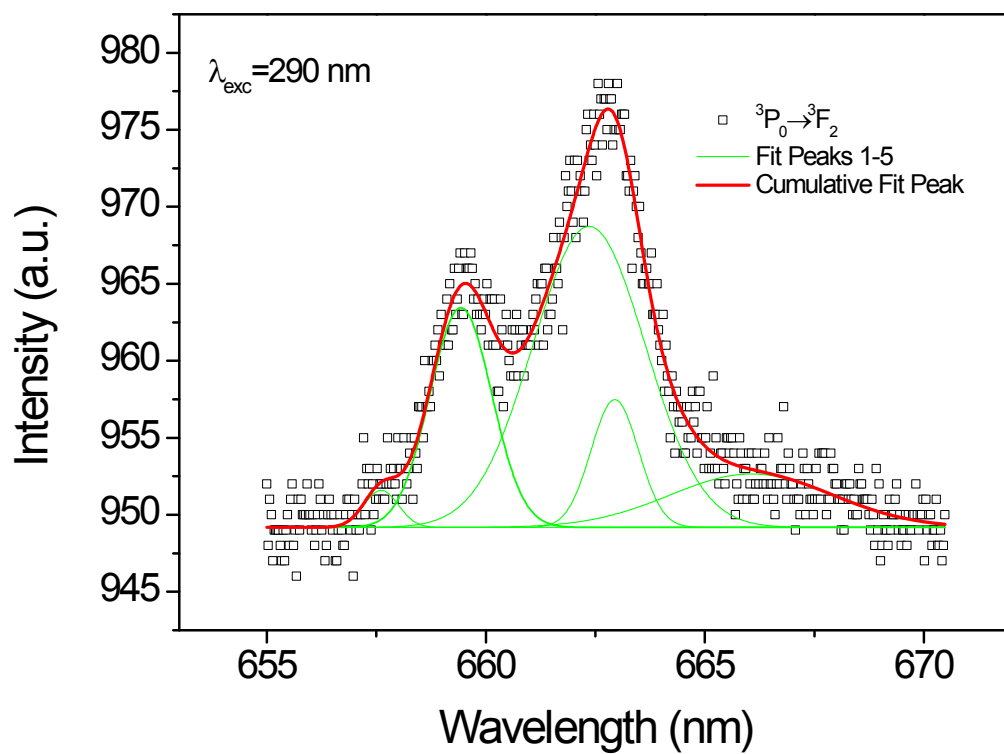

Supplement: c6dt03857c1.pdf [file c6dt03857c1.pdf]
